# Supplementary material for: Direct Degradation of Fresh and Dried Macroalgae by Agarivorans albus B2Z047
Source: MDPI journal article supplement (doi:10.3390/md22050203), 2024-04-28
Supplement: s1 [file s1]

## **Supplementary materials**

### **Direct degradation of fresh and dried macroalgae by *Agarivorans albus* B2Z047**

**Ya Gong<sup>1,2,3</sup>, Dan-Dan Shang<sup>1</sup>, Cheng-Lin Sun<sup>1</sup>, Zong-Jun Du<sup>1,2,3</sup> and Guan-Jun Chen<sup>1,2,\*</sup>**

<sup>1</sup>Marine College, Shandong University, Weihai 264209, China.

<sup>2</sup>State key Laboratory of Microbial Technology, Institute of Microbial Technology, Shandong University, Qingdao 266237, China.

<sup>3</sup>Weihai Research Institute of Industrial Technology of Shandong University, Weihai 264209, China

\*Correspondence: [guanjun@sdu.edu.cn](mailto:guanjun@sdu.edu.cn)

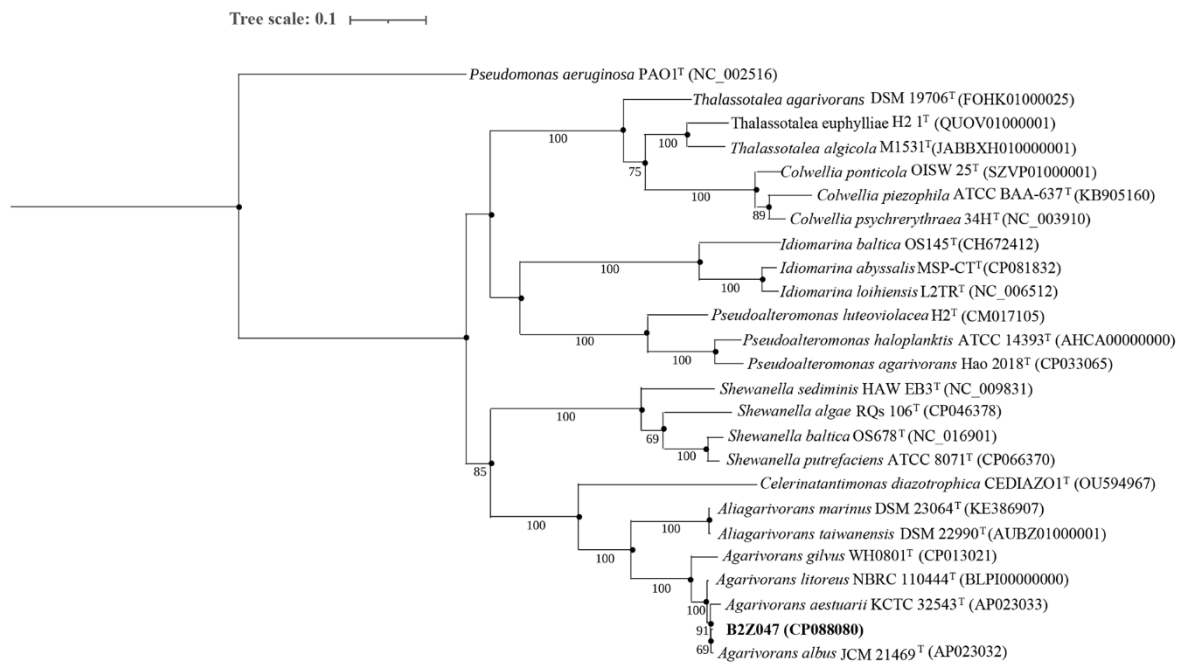

**Figure S1.** Phylogenomic tree based on alignment of 120 conserved proteins showing the taxonomic position of strain B2Z047. Numbers on nodes represent bootstrap values based on 1000 replications. Bootstrap values above 70% (based on 1000 replicates) are shown at branch nodes. Bar, 0.1 substitutions per nucleotide position.

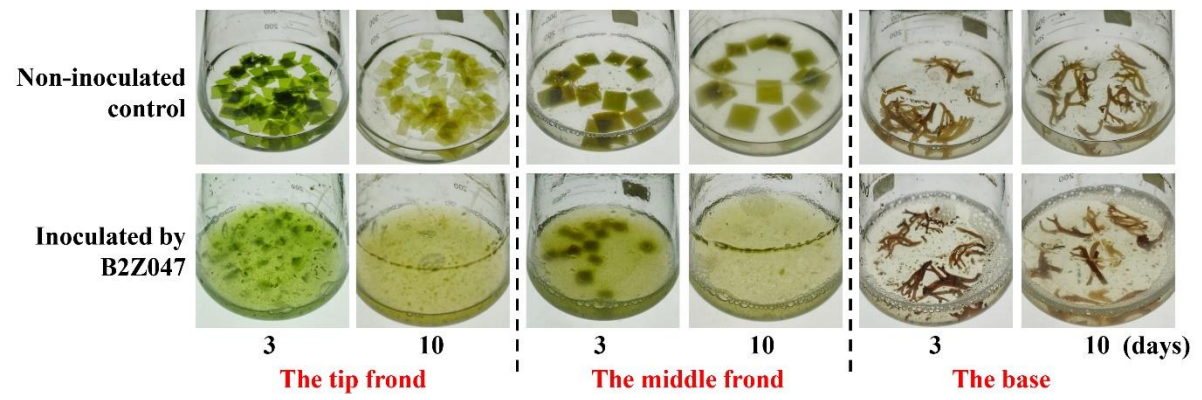

**Figure S2.** *A. albus* B2Z047 degrade fresh brown algae *S. japonica* efficiently.

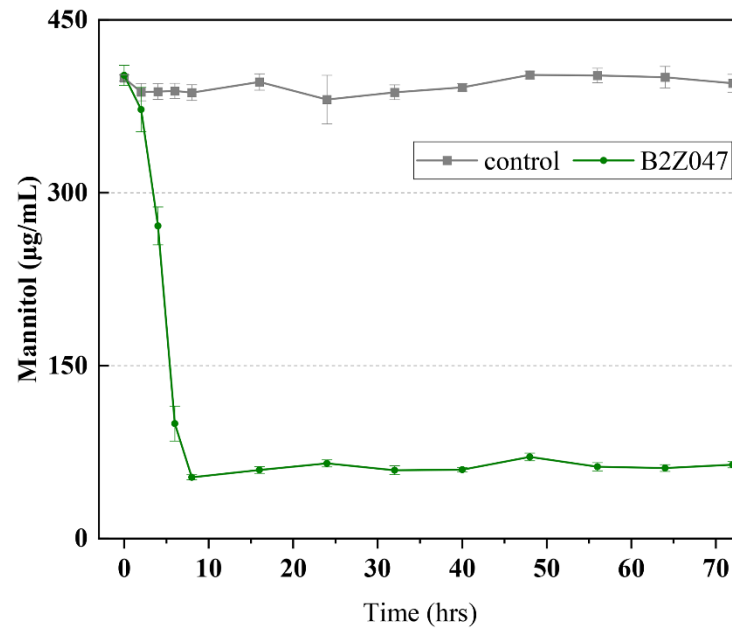

**Figure S3.** The mannitol curves during the degradation of *S. japonica*. The kelp medium without B2Z047 was used as the control.

Table S1. GGDC (%) values (dDDH) and ANI values among the genomes of strain B2Z047 and the related strains of the genus *Agarivorans*.

| ANI<br>dDDH                                                 | B2Z047 | <i>Agarivorans<br/>albus</i><br>JCM 21469 <sup>T</sup> | <i>Agarivorans<br/>gilvus</i><br>WH0801 <sup>T</sup> | <i>Agarivorans<br/>aestuarii</i><br>KCTC 32543 <sup>T</sup> | <i>Agarivorans<br/>litoreus</i><br>NBRC 110444 <sup>T</sup> |
|-------------------------------------------------------------|--------|--------------------------------------------------------|------------------------------------------------------|-------------------------------------------------------------|-------------------------------------------------------------|
| B2Z047                                                      | -      | 96.52                                                  | 79.23                                                | 90.70                                                       | 91.96                                                       |
| <i>Agarivorans<br/>albus</i><br>JCM 21469 <sup>T</sup>      | 75.80  | -                                                      | 79.29                                                | 91.38                                                       | 92.61                                                       |
| <i>Agarivorans<br/>gilvus</i><br>WH0801 <sup>T</sup>        | 26.10  | 19.90                                                  | -                                                    | 79.38                                                       | 79.59                                                       |
| <i>Agarivorans<br/>aestuarii</i><br>KCTC 32543 <sup>T</sup> | 48.00  | 44.40                                                  | 20.10                                                | -                                                           | 89.29                                                       |
| <i>Agarivorans<br/>litoreus</i><br>NBRC 110444 <sup>T</sup> | 52.60  | 49.50                                                  | 20.40                                                | 38.20                                                       | -                                                           |

Table S2. General features and genome sequencing information of *A. albus* B2Z047.

| Property                              | Term                             |
|---------------------------------------|----------------------------------|
| <b>General features</b>               |                                  |
| Classification                        | Domain <i>Bacteria</i>           |
|                                       | Phylum <i>Proteobacteria</i>     |
|                                       | Class <i>Gammaproteobacteria</i> |
|                                       | Order <i>Alteromonadales</i>     |
|                                       | Family <i>Alteromonadaceae</i>   |
|                                       | Genus <i>Agarivorans</i>         |
|                                       | Species <i>Agarivorans albus</i> |
|                                       | Strain B2Z047                    |
| Gram stain                            | Negative                         |
| Cell shape                            | Short rod                        |
| Motility                              | Flagella motility                |
| Temperature range; optimum            | 4-37 °C; 30 °C                   |
| pH range; optimum                     | 6.0-10.0; 7.0-8.0                |
| Salinity, optimum                     | 1.0–8.0 % NaCl (w/v); 3.0 %      |
| Oxygen requirement                    | Aerobic                          |
| <b>Sequencing</b>                     |                                  |
| Sequencing platform                   | PacBio SMRT                      |
| Fold coverage                         | 332 ×                            |
| Assembly method                       | HGAP4/Falcon                     |
| <b>Genome features</b>                |                                  |
| Genome size (bp)                      | 5,298,843 bp                     |
| G+C content (%)                       | 44.14 %                          |
| Protein-coding sequences (CDS)        | 4853                             |
| Gene total length of coding gene (bp) | 4,648,614 bp                     |
| Average CDS length (bp)               | 957.88                           |
| rRNA                                  | 22                               |
| tRNA                                  | 93                               |
| Other ncRNA                           | 46                               |
| GenBank serial number                 | CP088080                         |
| 16S rRNA gene serial number           | OM278383                         |
| NR annotation number (percent%)       | 4681 (96.46)                     |
| COG annotation number (percent%)      | 3986 (82.13)                     |
| GO annotation number (percent%)       | 2744 (56.54)                     |
| KEGG annotation number (percent%)     | 1518 (31.28)                     |
| CAZyme annotation number (percent%)   | 197 (4.06)                       |

Table S3. Distribution of CAZyme classes count in strain B2Z047.

| CAZy class | Count | CAZy class | Count | CAZy class | Count |
|------------|-------|------------|-------|------------|-------|
| AA2        | 1     | GH1        | 1     | GH94       | 2     |
| AA3        | 1     | GH2        | 5     | GH103      | 2     |
| AA6        | 1     | GH3        | 2     | GH108      | 1     |
| AA10       | 1     | GH4        | 1     | GH109      | 2     |
| CBM2       | 9     | GH5        | 9     | GH116      | 1     |
| CBM3       | 2     | GH8        | 4     | GH117      | 1     |
| CBM4       | 5     | GH9        | 3     | GH118      | 1     |
| CBM6       | 6     | GH10       | 2     | GH119      | 1     |
| CBM20      | 1     | GH11       | 1     | GH130      | 2     |
| CBM21      | 1     | GH13       | 22    | GH141      | 1     |
| CBM22      | 2     | GH14       | 1     | GH149      | 1     |
| CBM25      | 1     | GH16       | 10    | GH167      | 1     |
| CBM26      | 1     | GH17       | 1     | GT1        | 1     |
| CBM27      | 2     | GH18       | 1     | GT2        | 15    |
| CBM31      | 1     | GH19       | 1     | GT4        | 12    |
| CBM32      | 2     | GH23       | 6     | GT5        | 1     |
| CBM35      | 2     | GH26       | 4     | GT9        | 5     |
| CBM41      | 2     | GH30       | 1     | GT19       | 1     |
| CBM48      | 2     | GH31       | 2     | GT28       | 1     |
| CBM50      | 4     | GH36       | 4     | GT30       | 1     |
| CBM59      | 1     | GH38       | 1     | GT35       | 1     |
| CBM69      | 1     | GH43       | 2     | GT51       | 3     |
| CBM73      | 1     | GH48       | 2     | GT70       | 1     |
| CBM91      | 1     | GH50       | 4     | GT81       | 1     |
| CE1        | 2     | GH52       | 1     | GT83       | 1     |
| CE4        | 4     | GH73       | 2     | PL6        | 1     |
| CE7        | 1     | GH77       | 1     | PL7        | 8     |
| CE9        | 1     | GH86       | 2     | PL17       | 2     |
| CE11       | 1     | GH88       | 1     | PL38       | 1     |
